# Supplementary material
Source: publisher figshare collection journal article supplement (https://karger.figshare.com/articles/dataset/_/13065254)
Supplement: Supplementary file 1 [file 1]

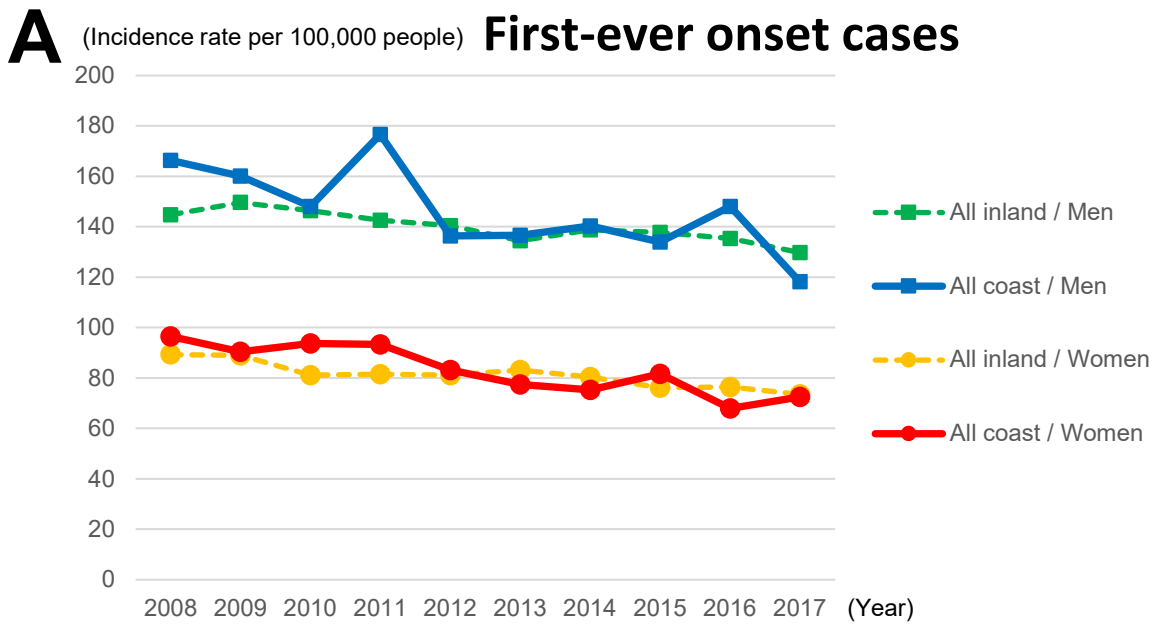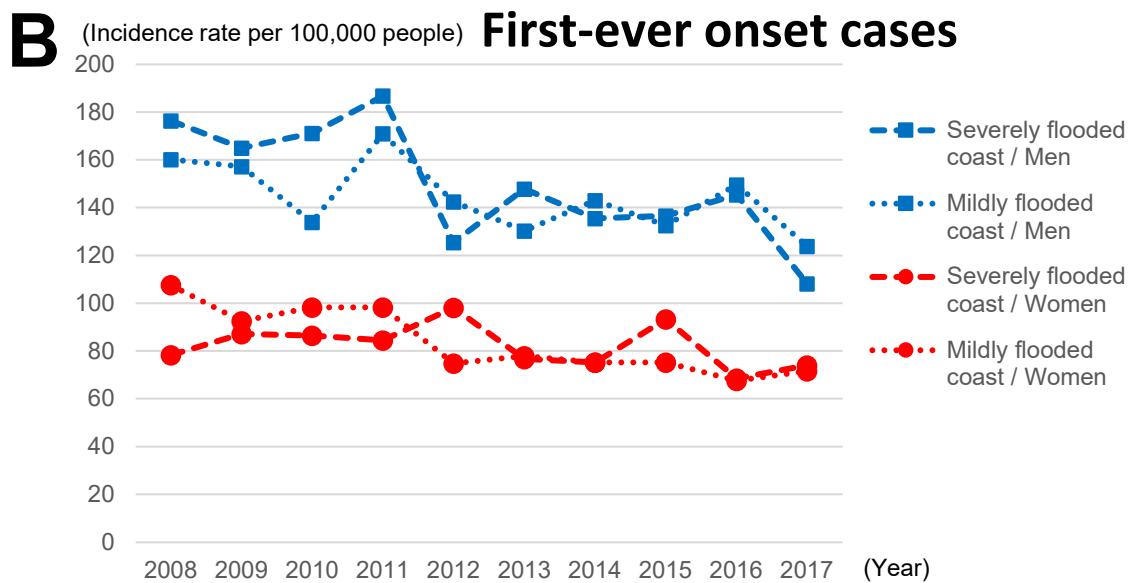

**Supplementary Figure 1.** Graph showing the age-adjusted incidence rate of first-ever onset of cerebrovascular diseases from 2008 to 2017 in Iwate Prefecture, Japan. Panel A shows comparison of incidence rate between all inland and all coast. Blue line shows inland men, green dot line showing coastal men, red line shows inland women, and yellow dot line shows coastal women. Panel B shows comparison of incidence rate between the mildly flooded coast and the severely flooded coast. Blue fine dot line shows men in the mildly flooded coast, blue rough dot line shows coastal men in the severely flooded coast, red fine dot line shows women in the mildly flooded coast, and red rough dot line shows women in the severely flooded coast.
