# Supplementary material
Source: publisher figshare collection journal article supplement (https://karger.figshare.com/articles/dataset/_/13065254)
Supplement: Supplementary file 2 [file 1]

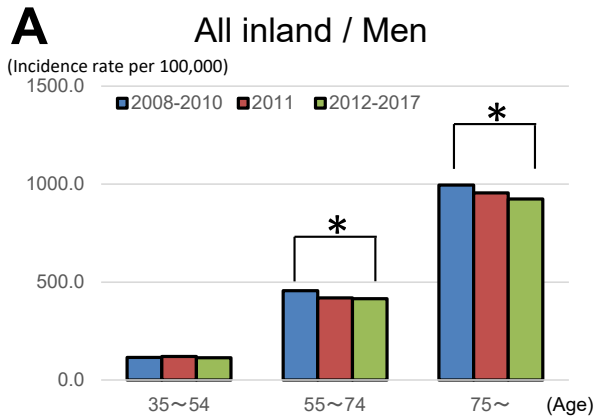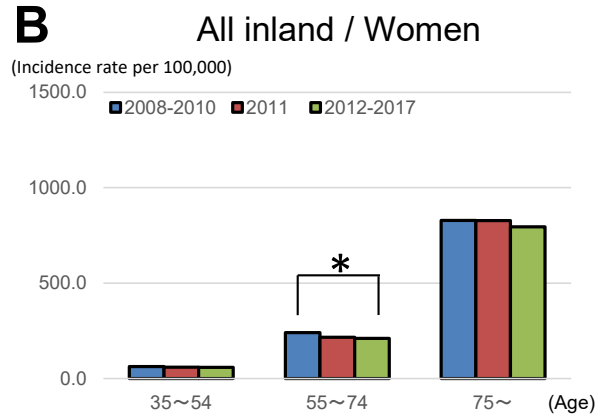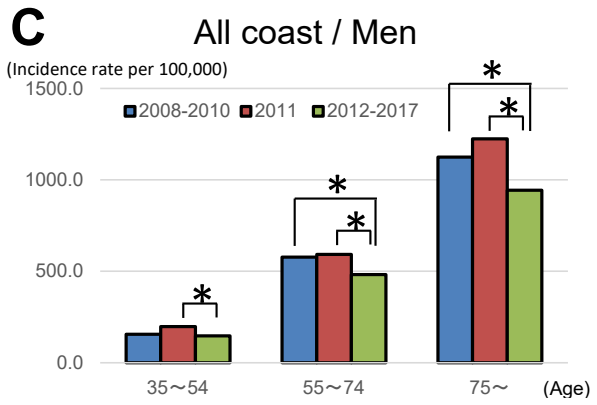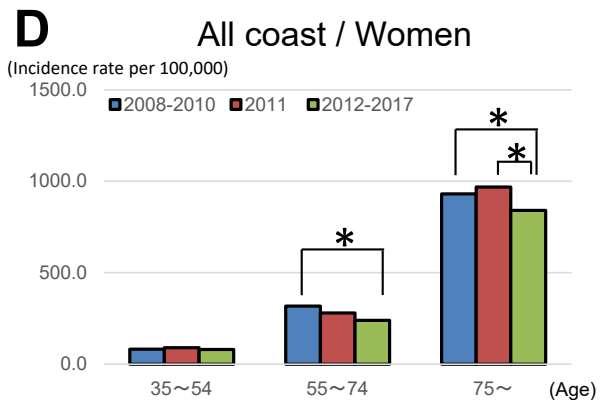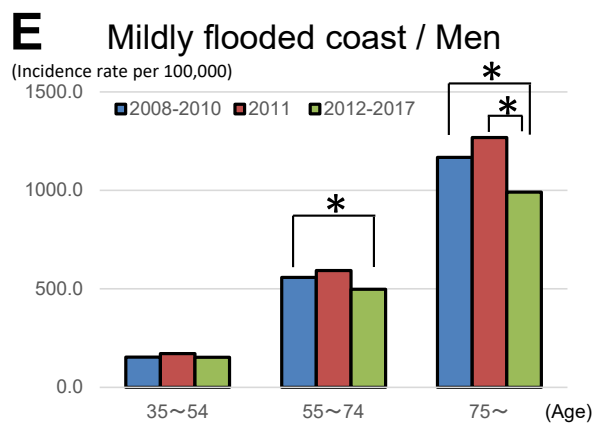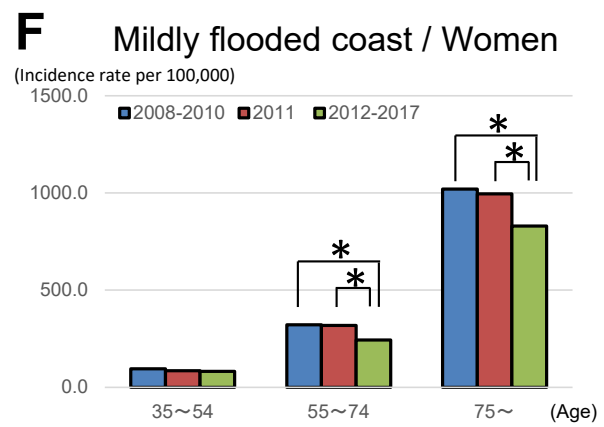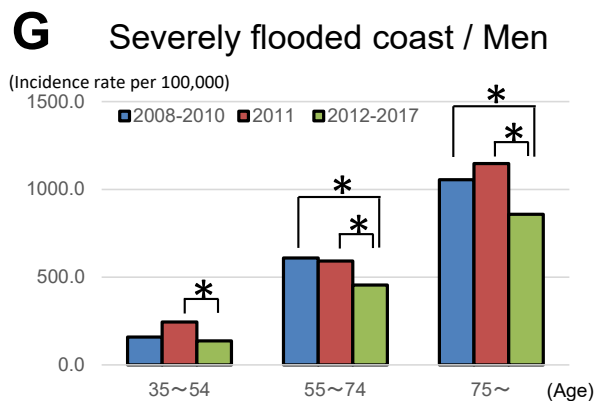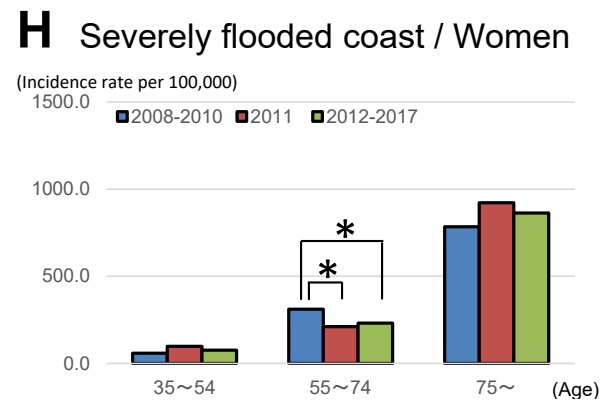

**Supplementary Figure 2.** Graph showing the age-specific incidence rate of first-ever onset of cerebrovascular diseases in the pre-disaster years from 2008 to 2010, in the disaster year of 2011, and in the post-disaster years from 2012 to 2017 in Iwate Prefecture. Panel A shows all inland men, panel B shows all inland women, panel C shows all coastal men, panel D shows all coastal women, panel E showing men of the mildly flooded coast, panel F showing women of the mildly flooded coast, panel G showing men of the severely flooded coast, and panel H showing women of the severely flooded coast. Blue column showing incidence rate of the pre-disaster years, red column showing those of the disaster year, and green column showing those of the post-disaster years. In all panels, asterisks indicate statistical differences. ( $p < 0.05$ )
