# Supplementary material
Source: publisher figshare collection journal article supplement (https://karger.figshare.com/articles/dataset/_/13065254)
Supplement: Supplementary file 4 [file 1]

**Supplementary Table 1.**

The relative risk of the incidence rate of cerebrovascular diseases of first-ever onset cases based on pre-disaster period from 2008 to 2010.

| Sex     | Year  | Age     | All inland |                 | All coast       |                 | Mildly flooded coast |                 | Severely flooded coast |                 |                 |
|---------|-------|---------|------------|-----------------|-----------------|-----------------|----------------------|-----------------|------------------------|-----------------|-----------------|
|         |       |         | RR         | ( 95% CI )      | RR              | ( 95% CI )      | RR                   | ( 95% CI )      | RR                     | ( 95% CI )      |                 |
| Men     |       |         |            |                 |                 |                 |                      |                 |                        |                 |                 |
|         | 2011  | 35-54   | 1.04       | ( 0.87 - 1.25 ) | 1.27            | ( 0.95 - 1.70 ) | 1.12                 | ( 0.76 - 1.64 ) | 1.54                   | ( 0.98 - 2.41 ) |                 |
|         |       | 55-74   | 0.92       | ( 0.84 - 1.01 ) | 1.03            | ( 0.88 - 1.19 ) | 1.06                 | ( 0.88 - 1.28 ) | 0.97                   | ( 0.76 - 1.24 ) |                 |
|         |       | 75-     | 0.96       | ( 0.87 - 1.06 ) | 1.09            | ( 0.93 - 1.28 ) | 1.09                 | ( 0.89 - 1.33 ) | 1.09                   | ( 0.82 - 1.44 ) |                 |
|         |       | Adjuste | 0.95       | ( 0.88 - 1.03 ) | 1.08            | ( 0.94 - 1.23 ) | 1.08                 | ( 0.91 - 1.28 ) | 1.06                   | ( 0.85 - 1.31 ) |                 |
|         | 2012- | 35-54   | 0.98       | ( 0.88 - 1.10 ) | 0.94            | ( 0.78 - 1.15 ) | 0.99                 | ( 0.78 - 1.27 ) | 0.86                   | ( 0.62 - 1.19 ) |                 |
|         |       | 55-74   | 0.91 *     | ( 0.86 - 0.96 ) | 0.84 *          | ( 0.76 - 0.92 ) | 0.75 *               | ( 0.64 - 0.87 ) | 0.75 *                 | ( 0.64 - 0.87 ) |                 |
|         |       | 75-     | 0.93 *     | ( 0.87 - 0.99 ) | 0.84 *          | ( 0.76 - 0.93 ) | 0.85 *               | ( 0.75 - 0.97 ) | 0.81 *                 | ( 0.68 - 0.97 ) |                 |
|         |       | Adjuste | 0.93 *     | ( 0.88 - 0.97 ) | 0.84 *          | ( 0.77 - 0.91 ) | 0.86 *               | ( 0.77 - 0.96 ) | 0.80 *                 | ( 0.70 - 0.92 ) |                 |
|         | Women |         |            |                 |                 |                 |                      |                 |                        |                 |                 |
|         |       | 2011    | 35-54      | 0.94            | ( 0.73 - 1.21 ) | 0.90            | ( 0.80 - 1.02 )      | 0.89            | ( 0.52 - 1.53 )        | 1.66            | ( 0.80 - 3.42 ) |
|         |       |         | 55-74      | 0.90            | ( 0.80 - 1.02 ) | 0.88            | ( 0.72 - 1.08 )      | 0.99            | ( 0.78 - 1.26 )        | 0.68 *          | ( 0.47 - 0.98 ) |
|         |       |         | 75-        | 1.00            | ( 0.92 - 1.08 ) | 1.04            | ( 0.91 - 1.20 )      | 0.98            | ( 0.82 - 1.16 )        | 1.18            | ( 0.93 - 1.49 ) |
| Adjuste |       |         | 0.98       | ( 0.88 - 1.09 ) | 1.01            | ( 0.84 - 1.21 ) | 0.98                 | ( 0.79 - 1.22 ) | 1.05                   | ( 0.75 - 1.46 ) |                 |
| 2012-   |       | 35-54   | 0.92       | ( 0.79 - 1.08 ) | 0.98            | ( 0.74 - 1.28 ) | 0.86                 | ( 0.62 - 1.19 ) | 1.29                   | ( 0.67 - 2.49 ) |                 |
|         |       | 55-74   | 0.88 *     | ( 0.81 - 0.94 ) | 0.75 *          | ( 0.67 - 0.85 ) | 0.76 *               | ( 0.65 - 0.89 ) | 0.74 *                 | ( 0.60 - 0.91 ) |                 |
|         |       | 75-     | 0.96       | ( 0.91 - 1.01 ) | 0.90 *          | ( 0.83 - 0.99 ) | 0.81 *               | ( 0.73 - 0.90 ) | 1.10                   | ( 0.95 - 1.28 ) |                 |
|         |       | Adjuste | 0.94       | ( 0.88 - 1.01 ) | 0.88 *          | ( 0.78 - 0.98 ) | 0.80 *               | ( 0.70 - 0.92 ) | 1.04                   | ( 0.86 - 1.26 ) |                 |

RR: Relative risk

CI: Confidence interval

Adjusted: The adjusted relative risk of the incidence rate adjusted by stratified age groups

\*: p<0.05
